# Supplementary material
Source: publisher site journal article supplement (https://www.spandidos-publications.com/6964/downloadSupplementary)
Supplement: Supplementary file 1 [file downloadSupplementary]

## Sheet: Sheet1
Table SIV. Down-regulated genes 3 h after LIPUS (low-intensity pulsed ultrasound) exposure.
Gene symbol	Fold-change	p value	TPM (Transcripts per million reads)						Gene title
			Ctr-1	Ctr-2	Ctr-3	LIPUS-1	LIPUS-2	LIPUS-3
DNAI4	0.318	0.029	2.826	1.711	6.412	0.226	0	0.718	dynein axonemal intermediate chain 4(dnai4)
GPR151	0.359	0.011	4.101	3.125	1.688	0	0	0.851	G protein-coupled receptor 151(GPR151)
UGT2B31	0.392	0.026	8.364	3.117	5.076	2.469	1.894	1.701	UDP-glucuronosyltransferase UGT2B31(UGT2B31)
ZG16	0.392	0.042	2.975	1.323	4.414	0.904	1.046	0.86	zymogen granule protein 16(Zg16)
TMPRSS2	0.419	0.041	2.423	4.947	6.203	1.288	2.243	1.891	transmembrane serine protease 2(TMPRSS2)
MPO	0.42	0.041	6.19	3.667	6.171	1.513	1.834	3.753	myeloperoxidase(MPO)
RFX3	0.43	0.01	18.809	24.37	26.86	6.926	11.327	12.511	regulatory factor X, 3 (influences HLA class II expression)(rfx3)
BRF2	0.443	0.001	7.905	8.108	6.203	3.078	3.055	3.674	BRF2 RNA polymerase III transcription initiation factor subunit(brf2)
ECHDC3	0.45	0.01	3.005	1.951	2.906	1.551	0.753	0.963	enoyl CoA hydratase domain containing 3(echdc3)
SORCS1	0.456	0.029	2.021	2.169	4.277	0.872	1.483	1.198	sortilin related VPS10 domain containing receptor 1(SORCS1)
TMEM97	0.457	0.013	5.45	3.828	4.18	1.456	2.12	2.702	transmembrane protein 97(tmem97)
NLRX1	0.466	0.005	9.656	9.36	7.143	3.241	5.099	3.945	NLR family member X1(Nlrx1)
MCM6	0.467	0.002	2.88	3.16	2.715	1.743	1.229	1.175	minichromosome maintenance complex component 6(Mcm6)
GZMA	0.477	0.036	2.866	3.807	4.413	1.635	1.193	2.676	granzyme A(GZMA)
HOXD4A	0.482	0.015	3.057	1.907	2.821	0.62	1.143	1.607	homeobox D4a(hoxd4a)
CDIN1	0.483	0.009	1.848	2.888	2.744	1.018	1.116	1.453	CDAN1 interacting nuclease 1(cdin1)
TRIM50	0.492	0.043	2.781	1.478	3.433	1.388	1.208	0.759	tripartite motif containing 50(TRIM50)
BOLA3	0.492	0.001	2.239	2.099	2.246	0.951	0.695	1.255	bolA family member 3(BOLA3)
NGRN	0.492	0.019	3.905	4.749	3.628	2.842	1.945	1.45	neugrin, neurite outgrowth associated(NGRN)
PI4KAP2	0.499	0.001	8.577	8.332	9.02	5.03	4.479	3.551	phosphatidylinositol 4-kinase alpha pseudogene 2(PI4KAP2)
ZBTB5	0.507	0.035	3.681	3.28	3.127	1.169	1.587	2.647	zinc finger and BTB domain containing 5(ZBTB5)
CYP2B19	0.51	0.012	2.716	1.891	1.468	0.913	0	0	cytochrome P450, family 2, subfamily b, polypeptide 19(Cyp2b19)
HUS1	0.532	0.02	1.785	2.385	3.321	1.183	1.23	1.462	HUS1 checkpoint clamp component(HUS1)
GIN1	0.54	0.021	2.454	2.243	1.371	0.82	0.865	1.186	gypsy retrotransposon integrase 1(GIN1)
RYR1	0.54	0.019	8.436	5.298	5.439	2.789	3.413	4.019	ryanodine receptor 1, skeletal muscle(Ryr1)
ABITRAM	0.545	0.014	2.549	2.535	1.714	0.791	1.277	1.401	actin binding transcription modulator(abitram)
ASB5	0.545	0.034	2.039	1.609	3.14	1.351	0.984	1.235	ankyrin repeat and SOCS box containing 5(ASB5)
EPG5	0.55	0.028	14.634	20.516	20.328	7.325	12.845	10.8	ectopic P-granules autophagy protein 5 homolog (C. elegans)(epg5)
TMEM63C	0.56	0.038	3.319	2.907	4.868	1.521	2.445	2.217	transmembrane protein 63C(tmem63c)
SPATA13	0.564	0.002	4.225	4.05	3.474	2.501	2.156	1.973	spermatogenesis associated 13(Spata13)
VDRB	0.572	0.009	21.484	15.404	17.929	12.551	9.633	9.165	vitamin D receptor b(vdrb)
GDA	0.572	0.041	6.228	4.161	4.098	2.425	3.702	2.22	guanine deaminase(Gda)
CTDP1	0.582	0.026	7.169	11.101	12.773	5.542	5.769	6.255	CTD (carboxy-terminal domain, RNA polymerase II, polypeptide A) phosphatase, subunit 1(Ctdp1)
STN1	0.582	0.032	2.338	2.523	1.632	1.574	1.206	0.71	STN1 subunit of CST complex(stn1)
NCAPG	0.584	0.003	3.154	2.877	2.405	1.567	1.847	1.5	non-SMC condensin I complex subunit G(NCAPG)
MTMR9	0.585	0.027	1.639	1.291	2.378	0.425	0.515	1.006	myotubularin related protein 9-like(MTMR9)
KRT20	0.595	0.044	2.437	1.234	1.578	0.252	0.87	0.796	keratin 20(Krt20)
KMT2A	0.6	0.006	9.497	9.276	10.721	6.773	6.215	4.84	lysine (K)-specific methyltransferase 2A(Kmt2a)
NME6	0.6	0.042	4.337	2.581	3.467	2.591	1.802	1.797	NME/NM23 nucleoside diphosphate kinase 6(nme6)
ZFP740	0.601	0.018	3.638	3.209	4.993	2.037	2.425	2.558	zinc finger protein 740(Zfp740)
KRT222	0.604	0.041	2.631	2.384	1.705	1.741	1.205	1.12	keratin 222(KRT222)
ADGRG5	0.609	0.04	7.065	4.239	5.734	4.08	2.779	3.425	adhesion G protein-coupled receptor G5(ADGRG5)
RMC1	0.61	0.025	6.558	4.178	6.185	3.826	2.985	3.367	regulator of MON1-CCZ1(Rmc1)
44621	0.611	0.036	8.943	12.688	9.005	7.939	5.89	4.997	mitochondrial amidoxime reducing component 1(marc1)
ZNF333	0.615	0.008	3.896	3.473	2.886	1.881	2.405	2.005	zinc finger protein 333(ZNF333)
RNF169	0.615	0.03	3.417	4.233	5.447	2.969	2.183	2.826	ring finger protein 169(rnf169)
ECD	0.615	0.046	9.421	5.762	8.775	5.904	4.047	4.635	ecdysoneless cell cycle regulator(ECD)
PARP9	0.619	0.014	9.985	6.824	8.859	5.488	4.589	5.676	poly (ADP-ribose) polymerase family, member 9(Parp9)
BAG2	0.619	0.035	1.899	1.634	2.798	1.395	1.307	1.128	BCL2-associated athanogene 2(Bag2)
MSLNL	0.623	0.018	27.223	38.62	37.065	17.855	22.85	23.134	mesothelin-like(Mslnl)
CDKL1	0.624	0.005	7.841	7.083	9.21	4.453	5.501	5.083	cyclin-dependent kinase-like 1 (CDC2-related kinase)(cdkl1)
HID1	0.629	0.022	2.755	2.894	4.058	1.721	2.17	2.152	HID1 domain containing(HID1)
EPHX4	0.629	0.005	9.581	7.69	10.582	6.11	5.719	5.546	epoxide hydrolase 4(Ephx4)
SYNPCC7002_A1628	0.633	0.028	2.069	1.287	1.912	1.161	0.917	1.111	Uncharacterized protein SYNPCC7002_A1628(SYNPCC7002_A1628)
C1QL2	0.635	0.02	10.827	7.247	7.227	5.448	5.332	4.997	complement component 1, q subcomponent-like 2(C1ql2)
ZGC:112023	0.637	0.025	3.67	2.749	2.773	1.614	2.358	1.898	zgc:112023(zgc:112023)
ERBB4	0.639	0.032	6.921	6.766	5.679	4.361	5.079	3.127	erb-b2 receptor tyrosine kinase 4(ERBB4)
SNX15	0.645	0.028	3.346	5.36	3.664	2.518	2.745	2.548	sorting nexin 15(Snx15)
B3GAT1	0.645	0.037	1.301	2.127	1.344	0	0.263	0.158	beta-1,3-glucuronyltransferase 1(B3gat1)
TINF2	0.646	0.005	3.01	3.292	3.172	2.342	2.07	1.748	TERF1 interacting nuclear factor 2(TINF2)
VPS45	0.646	0.038	12.135	10.59	9.105	5.222	8.239	7.341	vacuolar protein sorting 45(Vps45)
SCYL3	0.647	0.013	2.003	1.866	1.462	1.019	1.285	1.128	SCY1 like pseudokinase 3(SCYL3)
CASP3	0.649	0.005	34.978	26.903	27.733	20.448	19.3	18.045	caspase 3(Casp3)
KCNQ5	0.651	0.002	7.215	6.634	7.948	5.117	4.775	4.292	potassium voltage-gated channel, subfamily Q, member 5(Kcnq5)
WNT3	0.653	0.044	2.687	4.249	3.1	1.929	1.982	2.572	wingless-type MMTV integration site family, member 3(Wnt3)
ABHD8.L	0.655	0.013	2.926	2.596	3.63	2.074	1.766	2.115	abhydrolase domain containing 8 L homeolog(abhd8.L)
VCAM1	0.657	0.007	2.515	2.416	1.856	1.507	1.486	1.43	vascular cell adhesion molecule 1(VCAM1)
UNC13A	0.657	0.041	4.626	6.458	7.106	4.217	4.348	3.286	unc-13 homolog A(Unc13a)
SCGN	0.657	0.011	22.225	18.439	17.253	11.254	14.573	12.243	secretagogin, EF-hand calcium binding protein(SCGN)
DCLRE1C	0.659	0.006	1.8	1.895	1.617	1.201	0.741	1.312	DNA cross-link repair 1C, PSO2 homolog (S. cerevisiae)(dclre1c)
MUC2	0.66	0.028	69.52	59.392	85.905	45.366	40.684	55.211	mucin 2, oligomeric mucus/gel-forming(Muc2)
KLHDC1	0.666	0.021	12.245	13.85	14.753	11.056	8.885	7.507	kelch domain containing 1(Klhdc1)
SLC7A2	0.667	0.005	11.228	9.433	10.764	6.641	6.42	7.934	solute carrier family 7 member 2(SLC7A2)
CD226	0.667	0.007	1.69	1.787	1.447	1.041	1.247	0.532	CD226 molecule(CD226)
KCNG3	0.668	0.011	3.904	3.918	4.595	2.337	3.164	2.836	potassium voltage-gated channel modifier subfamily G member 3(Kcng3)
TOR1B	0.671	0.044	10.481	8.537	7.555	5.858	7.273	4.785	torsin family 1 member B(TOR1B)
MASTL	0.671	0.041	1.177	1.429	1.968	0.605	0.728	0.844	microtubule associated serine/threonine kinase-like(mastl)
FYNB	0.672	0.046	7.464	9.461	11.197	5.307	7.486	6.032	FYN proto-oncogene, Src family tyrosine kinase b(fynb)
TMEM235	0.675	0.024	1.845	2.594	2.542	1.399	1.565	1.708	transmembrane protein 235(TMEM235)
SRRD	0.677	0.041	1.561	1.752	1.798	0.138	0.639	1.524	SRR1 domain containing(Srrd)
KATNBL1	0.678	0.016	11.486	9.412	8.948	7.801	5.994	6.439	katanin regulatory subunit B1 like 1(KATNBL1)
CORO1B	0.678	0.005	4.988	3.802	4.514	3.048	2.91	3.01	coronin, actin binding protein 1B(Coro1b)
MPPE1	0.679	0.012	2.488	2.108	1.796	1.508	1.336	1.462	metallophosphoesterase 1(mppe1)
HE1.2	0.683	0.017	1.499	1.853	1.352	1.197	0.988	0.708	hatching enzyme 1, tandem dupliate 2(he1.2)
SLC9A8	0.685	0.009	10.536	13.977	13.479	8.409	8.431	9.01	solute carrier family 9 member A8(SLC9A8)
CPNE8	0.688	0.025	6.531	5.141	7.011	3.981	3.904	4.929	copine 8(CPNE8)
WIZ	0.689	0.028	7.403	10.729	10.656	6.768	6.347	6.447	widely-interspaced zinc finger motifs(Wiz)
CEP162	0.695	0.026	4.842	3.339	4.128	2.858	3.043	2.577	centrosomal protein 162(cep162)
AP5S1	0.696	0.012	1.453	1.271	1.75	0.969	1.077	1.012	adaptor related protein complex 5 subunit sigma 1(AP5S1)
MLIP	0.697	0.016	1.891	1.598	1.509	1.103	1.343	1.041	muscular LMNA interacting protein(MLIP)
FHOD1	0.697	0.046	11.574	13.107	16.84	8.207	9.47	11.127	formin homology 2 domain containing 1(Fhod1)
PITPNC1	0.697	0.005	10.286	10.483	11.133	6.467	7.796	8.074	phosphatidylinositol transfer protein, cytoplasmic 1(pitpnc1)
ASB13	0.698	0.048	1.982	1.883	2.874	1.596	1.637	1.394	ankyrin repeat and SOCS box-containing 13(Asb13)
OTUD6B	0.699	0.014	3.837	4.346	3.521	3.081	2.373	2.746	OTU deubiquitinase 6B(otud6b)
GRK5	0.701	0.019	12.987	14.668	18.464	10.307	10.686	11.023	G protein-coupled receptor kinase 5(GRK5)
NBN	0.702	0.007	1.712	1.721	1.617	1.056	1.372	1.139	nibrin(nbn)
XKR8	0.702	0.016	11.813	12.067	14.829	10.239	8.8	8.129	XK-related protein 8(xkr8)
TRAPPC13	0.705	0.024	6.159	5.593	7.582	4.022	5.041	4.514	trafficking protein particle complex subunit 13(trappc13)
PYCR3	0.706	0.039	1.786	2.634	2.459	1.53	1.517	1.756	pyrroline-5-carboxylate reductase 3(pycr3)
PCNP	0.71	0.006	35.462	37.396	36.478	26.093	22.689	29.186	PEST proteolytic signal containing nuclear protein(PCNP)
DDHD2	0.71	0.042	1.734	1.445	1.903	1.421	1.201	0.808	DDHD domain containing 2(DDHD2)
SFXN5	0.71	0.002	5.639	6.315	5.52	4.066	4.412	3.921	sideroflexin 5(Sfxn5)
NIPBLA	0.711	0.002	43.903	47.66	49.86	32.723	36.359	31.454	NIPBL cohesin loading factor a(nipbla)
SPICE1	0.712	0.043	4.761	4.623	6.813	3.695	3.618	4.051	spindle and centriole associated protein 1(Spice1)
MAPK13	0.712	0.003	18.122	18.016	15.588	11.679	12.043	13.078	mitogen-activated protein kinase 13(MAPK13)
GLIPR2	0.713	0.004	97.803	84.788	89.289	69.527	58.58	65.77	GLI pathogenesis-related 2(Glipr2)
BLOC1S4	0.713	0.02	3.303	3.297	3.238	2.587	2.59	1.905	biogenesis of lysosomal organelles complex 1 subunit 4(BLOC1S4)
ELAPOR1	0.713	0.004	1.601	1.392	1.43	0.941	0.66	1.157	endosome-lysosome associated apoptosis and autophagy regulator 1(ELAPOR1)
RAB6B	0.716	0.042	11.359	10.42	7.907	7.485	6.168	7.427	RAB6B, member RAS oncogene family(Rab6b)
PIGF	0.716	0.008	5.217	4.393	4.03	3.144	3.296	3.266	phosphatidylinositol glycan anchor biosynthesis class F(PIGF)
EPPK1	0.722	0.04	198.249	173.174	240.016	146.201	127.516	166.182	epiplakin 1(EPPK1)
CARD19	0.722	0.03	9.867	11.494	8.068	6.996	7.551	6.52	caspase recruitment domain family member 19(CARD19)
GALNT4	0.723	0.007	3.772	3.555	4.205	2.831	3.01	2.502	polypeptide N-acetylgalactosaminyltransferase 4(GALNT4)
FZD3.L	0.724	0.013	12.794	15.252	14.531	11.738	9.451	9.697	frizzled class receptor 3 L homeolog(fzd3.L)
ELOVL5	0.725	0.031	2.526	2.043	2.309	1.386	1.737	1.887	ELOVL fatty acid elongase 5(elovl5)
PSD	0.726	0.018	4.468	4.442	3.7	3.292	2.637	3.231	pleckstrin and Sec7 domain containing(PSD)
CYP27A1	0.728	0.042	12.095	8.565	10.807	8.367	7.694	6.718	sterol 26-hydroxylase, mitochondrial(CYP27A1)
GSP-2	0.729	0.025	94.59	67.973	74.061	56.563	59.607	54.816	Serine/threonine-protein phosphatase PP1-beta(gsp-2)
WRNIP1	0.731	0.047	4.357	4.829	5.732	4.35	3.339	3.242	WRN helicase interacting protein 1(Wrnip1)
ZMYM4	0.732	0.044	8.497	11.06	10.888	6.605	6.986	8.7	zinc finger, MYM-type 4(Zmym4)
TTN-1	0.733	0.031	13.549	12.051	9.542	8.995	8.373	8.141	Titin homolog(ttn-1)
CD79A	0.735	0.043	5.066	4.404	6.29	4.267	3.588	3.636	CD79A antigen (immunoglobulin-associated alpha)(Cd79a)
DEF8	0.735	0.006	5.71	5.877	6.009	4.385	4.786	3.822	differentially expressed in FDCP 8 homolog(Def8)
SEPSECS	0.736	0.02	2.985	3.021	3.861	2.588	2.273	2.361	Sep (O-phosphoserine) tRNA:Sec (selenocysteine) tRNA synthase(sepsecs)
C1GALT1B	0.738	0.001	18.533	17.412	17.369	12.925	13.435	12.978	core 1 synthase, glycoprotein-N-acetylgalactosamine 3-beta-galactosyltransferase, 1b(c1galt1b)
OGFR	0.74	0.035	8.682	7.253	7.679	5.719	4.987	6.882	opioid growth factor receptor(Ogfr)
AGMO	0.741	0.002	1.454	1.425	1.272	1.068	0.785	1.004	alkylglycerol monooxygenase(agmo)
MRPL45.L	0.742	0.004	3.182	3.142	3.712	2.459	2.59	2.378	mitochondrial ribosomal protein L45 L homeolog(mrpl45.L)
MSMO1	0.742	0.026	1.275	1.444	1.624	0.971	0.972	1.224	methylsterol monooxygenase 1(msmo1)
ARHGEF15	0.744	0.025	10.112	10.773	8.691	6.938	6.697	8.392	Rho guanine nucleotide exchange factor 15(ARHGEF15)
TLR13	0.745	0.016	3.967	3.865	3.072	2.647	2.778	2.653	toll-like receptor 13(Tlr13)
PPIL2	0.748	0.004	4.828	4.428	5.33	3.669	3.533	3.678	peptidylprolyl isomerase like 2(PPIL2)
LOC106562066	0.752	0.008	5.416	5.304	4.982	3.475	4.186	4.177	trafficking protein particle complex subunit 2-like protein(LOC106562066)
RNASEL3	0.752	0.038	5.119	5.185	5.539	3.63	3.543	4.855	ribonuclease like 3(rnasel3)
STXBP3	0.754	0.029	26.993	26.262	27.888	16.93	22.437	22.32	syntaxin binding protein 3(STXBP3)
STK35	0.755	0.025	6.616	7.639	8.444	5.114	5.791	6.195	serine/threonine kinase 35(STK35)
KLC2	0.755	0.049	95.704	108.258	89.006	64.297	69.863	88.507	kinesin light chain 2(Klc2)
HABP4	0.755	0.042	1.526	1.548	1.236	1.259	0.31	0.414	hyaluronan binding protein 4(HABP4)
MUSK	0.758	0.023	2.213	1.821	1.792	1.473	1.606	1.332	muscle associated receptor tyrosine kinase(MUSK)
ZNF862	0.76	0.009	5.304	4.692	5.234	4.273	3.7	3.61	zinc finger protein 862(ZNF862)
RP9	0.76	0.043	8.797	11.043	10.211	8.85	6.781	7.266	retinitis pigmentosa 9 (human)(Rp9)
EXOC3L1	0.76	0.005	1.237	1.378	1.46	0.894	0.777	1.094	exocyst complex component 3-like 1(exoc3l1)
DCUN1D1	0.761	0.015	8.434	6.604	7.415	5.935	5.411	5.67	defective in cullin neddylation 1 domain containing 1(DCUN1D1)
VPS52	0.764	0.008	8.706	9.943	10.112	7.612	6.737	7.602	VPS52 subunit of GARP complex(Vps52)
EXTL2	0.764	0.018	1.578	1.938	1.737	1.478	1.285	1.247	exostosin like glycosyltransferase 2(EXTL2)
SLC30A5	0.764	0.037	9.732	10.041	12.324	7.825	7.466	9.197	solute carrier family 30 member 5(slc30a5)
MCMBP	0.764	0.042	3.577	4.274	4.437	2.776	3.026	3.602	minichromosome maintenance complex binding protein(mcmbp)
PIK3AP1	0.765	0.016	2.526	3.048	3.247	2.219	2.225	2.263	phosphoinositide-3-kinase adaptor protein 1(PIK3AP1)
WDSUB1	0.765	0.009	2.421	2.215	2.759	1.887	1.836	1.913	WD repeat, sterile alpha motif and U-box domain containing 1(wdsub1)
BNIP3	0.768	0.026	2.611	3.435	3.191	2.459	2.252	2.338	BCL2/adenovirus E1B interacting protein 3(Bnip3)
MKI67	0.77	0.002	3.242	3.381	3.029	2.601	2.408	2.417	antigen identified by monoclonal antibody Ki 67(Mki67)
INO80C	0.77	0.009	6.547	6.236	6.105	4.849	5.364	4.377	INO80 complex subunit C(Ino80c)
KRTCAP3	0.771	0.012	4.57	4.066	3.785	3.248	2.951	3.357	keratinocyte associated protein 3(KRTCAP3)
NISCH	0.771	0.015	7.145	8.581	7.888	5.561	6.576	6.055	nischarin(Nisch)
SLC22A17	0.772	0.027	4.825	3.987	4.248	3.442	3.679	2.966	solute carrier family 22 member 17(SLC22A17)
NPTN	0.773	0.041	14.343	16.287	14.252	10.022	13.491	11.38	neuroplastin(Nptn)
TIGARA	0.774	0.031	1.351	1.583	1.519	1.172	0.963	1.286	TP53 induced glycolysis regulatory phosphatase a(tigara)
UGT2A1	0.774	0.006	28.952	25.433	26.017	19.701	22.318	20.242	UDP glucuronosyltransferase family 2 member A1 complex locus(UGT2A1)
ALG6	0.776	0.024	4.04	3.758	3.384	3.133	2.995	2.558	ALG6, alpha-1,3-glucosyltransferase(ALG6)
REV3L	0.776	0.008	2.792	3.076	3.173	2.136	2.454	2.432	REV3 like, DNA directed polymerase zeta catalytic subunit(Rev3l)
COMMD9	0.777	0.04	3.459	2.736	3.5	2.649	2.265	2.592	COMM domain containing 9(Commd9)
ADGRG6	0.782	0.01	70.448	58.516	65.156	49.702	53.249	48.52	adhesion G protein-coupled receptor G6(adgrg6)
EXOC1	0.782	0.005	28.471	30.834	27.598	22.201	21.46	24.351	exocyst complex component 1(Exoc1)
PTPRB	0.785	0.029	8.186	7.786	7.195	5.376	6.89	5.987	protein tyrosine phosphatase, receptor type, B(Ptprb)
MPV17L	0.785	0.033	5.231	5.158	6.227	4.226	4.851	3.972	MPV17 mitochondrial inner membrane protein like(MPV17L)
PRXL2C	0.786	0.031	18.62	16.258	18.738	14.014	12.443	15.783	peroxiredoxin like 2C(prxl2c)
TRMT5	0.787	0.04	1.916	2.34	2.375	1.82	1.842	1.546	tRNA methyltransferase 5(trmt5)
DMAP1	0.789	0.007	9.308	9.892	8.883	7.421	7.933	6.836	DNA methyltransferase 1 associated protein 1(DMAP1)
GALT	0.79	0.045	2.292	2.796	3.076	2.034	2.221	2.156	galactose-1-phosphate uridylyltransferase(GALT)
SPR	0.791	0.049	2.662	3.577	3.242	2.629	2.338	2.481	sepiapterin reductase(SPR)
TIMELESS	0.792	0.012	1.559	1.63	1.38	1.122	1.235	1.257	timeless circadian regulator(TIMELESS)
DCAF6	0.797	0.042	4.26	4.921	4.638	3.413	4.252	3.393	DDB1 and CUL4 associated factor 6(DCAF6)
PANK1	0.798	0.032	11.841	10.191	9.688	7.966	8.024	9.288	pantothenate kinase 1(PANK1)
TBC1D23	0.798	0.038	38.583	40.487	38.212	33.253	34.318	26.576	TBC1 domain family, member 23(tbc1d23)
PIGB	0.798	0.012	4.694	5.159	4.232	3.687	3.818	3.703	phosphatidylinositol glycan anchor biosynthesis, class B(pigb)
CHCHD3	0.799	0.005	15.211	15.595	17.324	13.076	12.228	13.087	coiled-coil-helix-coiled-coil-helix domain containing 3(CHCHD3)
ADORA1	0.8	0.026	9.336	8.993	8.667	6.29	7.564	7.858	adenosine A1 receptor(ADORA1)
RHBDL2	0.8	0.001	7.896	8.502	8.466	6.822	6.453	6.663	rhomboid like 2(Rhbdl2)
CCDC142	0.8	0.014	1.103	1.319	1.302	0.78	0.587	0.937	coiled-coil domain containing 142(CCDC142)
BTN1A1	0.8	0.001	16.474	16.801	17.032	13.824	13.715	13.133	butyrophilin subfamily 1 member A1(BTN1A1)
TAF1	0.8	0.02	20.094	19.816	21.564	15.14	16.524	18.404	TATA-box binding protein associated factor 1(TAF1)
ATRAID	0.8	0.035	3.305	2.68	2.825	2.539	2.221	2.382	all-trans retinoic acid-induced differentiation factor(atraid)
ZNF471	0.8	0.001	6.671	6.567	6.206	5.174	5.311	5.325	zinc finger protein 471(ZNF471)
RTASE	0.8	0.018	296.646	273.302	334.088	241.595	248.152	245.997	Probable RNA-directed DNA polymerase from transposon BS(RTase)
RBM18	0.8	0.034	7.281	7.71	7.592	6.422	5.389	6.755	RNA binding motif protein 18(rbm18)
EXOC6	0.8	0.039	3.055	3.725	3.667	2.778	2.719	3.052	exocyst complex component 6(EXOC6)
CSPG5	0.8	0.032	3.51	3.419	4.003	2.785	3.025	3.236	chondroitin sulfate proteoglycan 5(CSPG5)
TAF7	0.8	0.006	16.498	18.675	17.085	14.039	14.49	14.738	TATA-box binding protein associated factor 7(TAF7)
